# Supplementary material for: Menstrual cups and sanitary pads to reduce school attrition, and sexually transmitted and reproductive tract infections: a cluster randomised controlled feasibility study in rural Western Kenya
Source: BMJ Open. 2016 Nov 23;6(11):e013229. doi: 10.1136/bmjopen-2016-013229 (PMC5168542; doi:10.1136/bmjopen-2016-013229)
Supplement: Supplementary data [file bmjopen-2016-013229supp.pdf]

## Supplementary Tables and Figures

**Table S1 Proportion of participants followed-up by 9 month and 12 month cut off points**

|                             | Cups       | Pads       | Control    | Total      |
|-----------------------------|------------|------------|------------|------------|
| Duration                    | (N=188)    | (N=256)    | (N=200)    | (N=644)    |
| <b>Cut off at 9 months</b>  |            |            |            |            |
| 0 to 9 month                | 64(34.0%)  | 80(31.3%)  | 74(37.0%)  | 218(33.9%) |
| 9 or more months            | 124(66.0%) | 176(68.8%) | 126(63.0%) | 426(66.1%) |
| <b>Cut off at 12 months</b> |            |            |            |            |
| 0 to 11 months              | 95(50.5%)  | 119(46.5%) | 110(55.0%) | 324(50.3%) |
| 12 or more months           | 93(49.5%)  | 137(53.5%) | 90(45.0%)  | 320(49.7%) |

**Table S2 Reason for dropping out of school**

|                                | Cups       | Pads       | Control    | Total      |
|--------------------------------|------------|------------|------------|------------|
| Characteristics                | (N=188)    | (N=256)    | (N=200)    | (N=644)    |
| No dropout events              | 167        | 230        | 184        | 581        |
| All dropout events             | 21         | 26         | 16         | 63         |
| <b>Reported dropout events</b> |            |            |            |            |
| Pregnancy-related              | 12 (57.1%) | 15 (57.7%) | 11 (68.8%) | 38 (60.3%) |
| Marriage                       | 1(4.8%)    | 0(0.0%)    | 1(6.3%)    | 2(3.2%)    |
| Drop-out other reasons         | 7(33.3%)   | 9(34.6%)   | 3(18.8%)   | 19(30.2%)  |
| Not able to identify reason    | 1(4.8%)    | 2(7.7%)    | 1(6.3%)    | 4(6.3%)    |

**Table S3 Effect of cup use vs non-use on composite outcome~, overall, and by duration of intervention**

| FU‡                                      | Prevalence (%) |             |              | Unadjusted PR (95% CI) § |                 |                 |                 | Adjusted PR (95% CI) § |                 |                 |                 |
|------------------------------------------|----------------|-------------|--------------|--------------------------|-----------------|-----------------|-----------------|------------------------|-----------------|-----------------|-----------------|
|                                          | Evidence       | Cup not     | Control      | Cup used v               | Cup used v      | Cup not-used    | Cup used v      | Cup used v             | Cup users v     | Cup not used    | Cup used v      |
|                                          | cup used †     | used        |              | not used                 | control         | v control       | not used +      | not used               | control         | v control       | not used +      |
|                                          |                |             |              |                          |                 |                 |                 |                        |                 |                 |                 |
|                                          |                |             |              |                          |                 |                 | control         |                        |                 |                 | control         |
| All                                      | 13/117(11.1)   | 14/48(29.2) | 28/172(16.3) | 0.38(0.20,0.70)          | 0.68(0.40,1.15) | 1.79(1.00,3.22) | 0.51(0.31,0.83) | 0.38(0.20,0.71)        | 0.66(0.38,1.14) | 1.74(1.03,2.93) | 0.50(0.30,0.84) |
| <i>Stratified at 9 months follow-up</i>  |                |             |              |                          |                 |                 |                 |                        |                 |                 |                 |
| <9m                                      | 6/32(18.8)     | 8/23(34.8)  | 8/59(13.6)   | 0.54(0.32,0.92)          | 1.38(0.60,3.20) | 2.57(1.24,5.30) | 0.86(0.47,1.58) | 0.60(0.30,1.23)        | 1.49(0.61,3.67) | 2.48(1.22,5.04) | 0.95(0.46,1.97) |
| ≥9m                                      | 7/85(8.2)      | 6/25(24.0)  | 20/113(17.7) | 0.34(0.10,1.19)          | 0.47(0.25,0.86) | 1.36(0.47,3.93) | 0.40(0.18,0.91) | 0.34(0.10,1.16)        | 0.48(0.25,0.91) | 1.42(0.48,4.18) | 0.40(0.17,0.92) |
| <i>Stratified at 12 months follow-up</i> |                |             |              |                          |                 |                 |                 |                        |                 |                 |                 |
| <12m                                     | 11/53(20.8)    | 12/31(38.7) | 16/93(17.2)  | 0.54(0.29,0.99)          | 1.21(0.58,2.50) | 2.25(1.15,4.38) | 0.80(0.45,1.44) | 0.61(0.32,1.19)        | 1.18(0.55,2.56) | 1.93(1.08,3.45) | 0.85(0.44,1.65) |
| ≥12m                                     | 2/64(3.1)      | 2/17(11.8)  | 12/79(15.2)  | 0.27(0.03,2.45)          | 0.21(0.06,0.73) | 0.77(0.19,3.93) | 0.23(0.05,1.18) | -                      | -               | -               | -               |

Abbreviations: CI: confidence interval; FU: follow-up time after intervention provision; <9m: less than 9 months; ≥9m: 9 months or greater; <12m: less than 12

months; ≥12m: 12 months or greater

~ The composite variable is a combination of dropout and laboratory confirmation of the presence or absence of a tested STI among non-dropouts at endline

§ Covariates in adjusted analysis are age, socio-economic status, and reported sexual activity (had sexual intercourse) at start of study

† Evidence based on physical observation of cup colour change at participant follow-up by study nurse.

Figure S1 - The Mooncup®

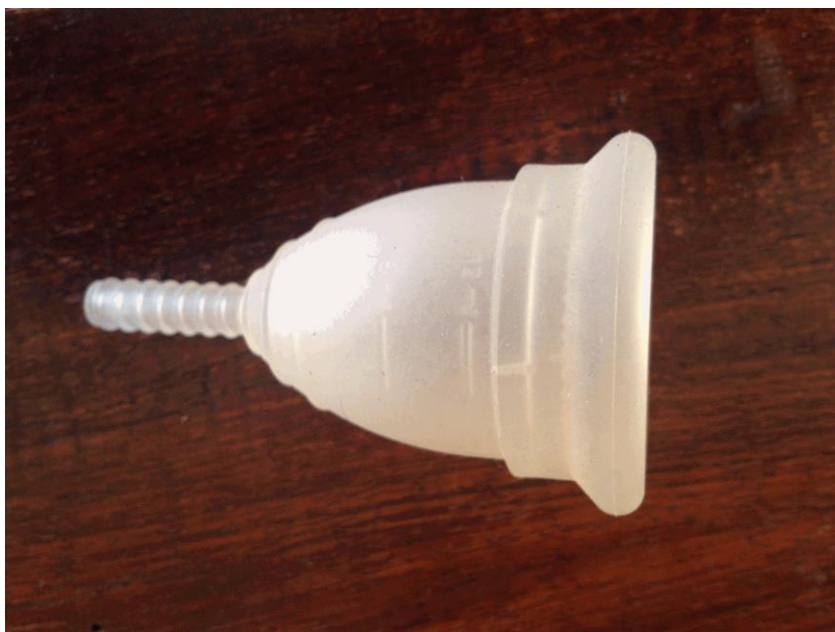

Figure S2 - Impact of pads and cups on school dropout, sexually transmitted and reproductive tract infections by 12 months duration

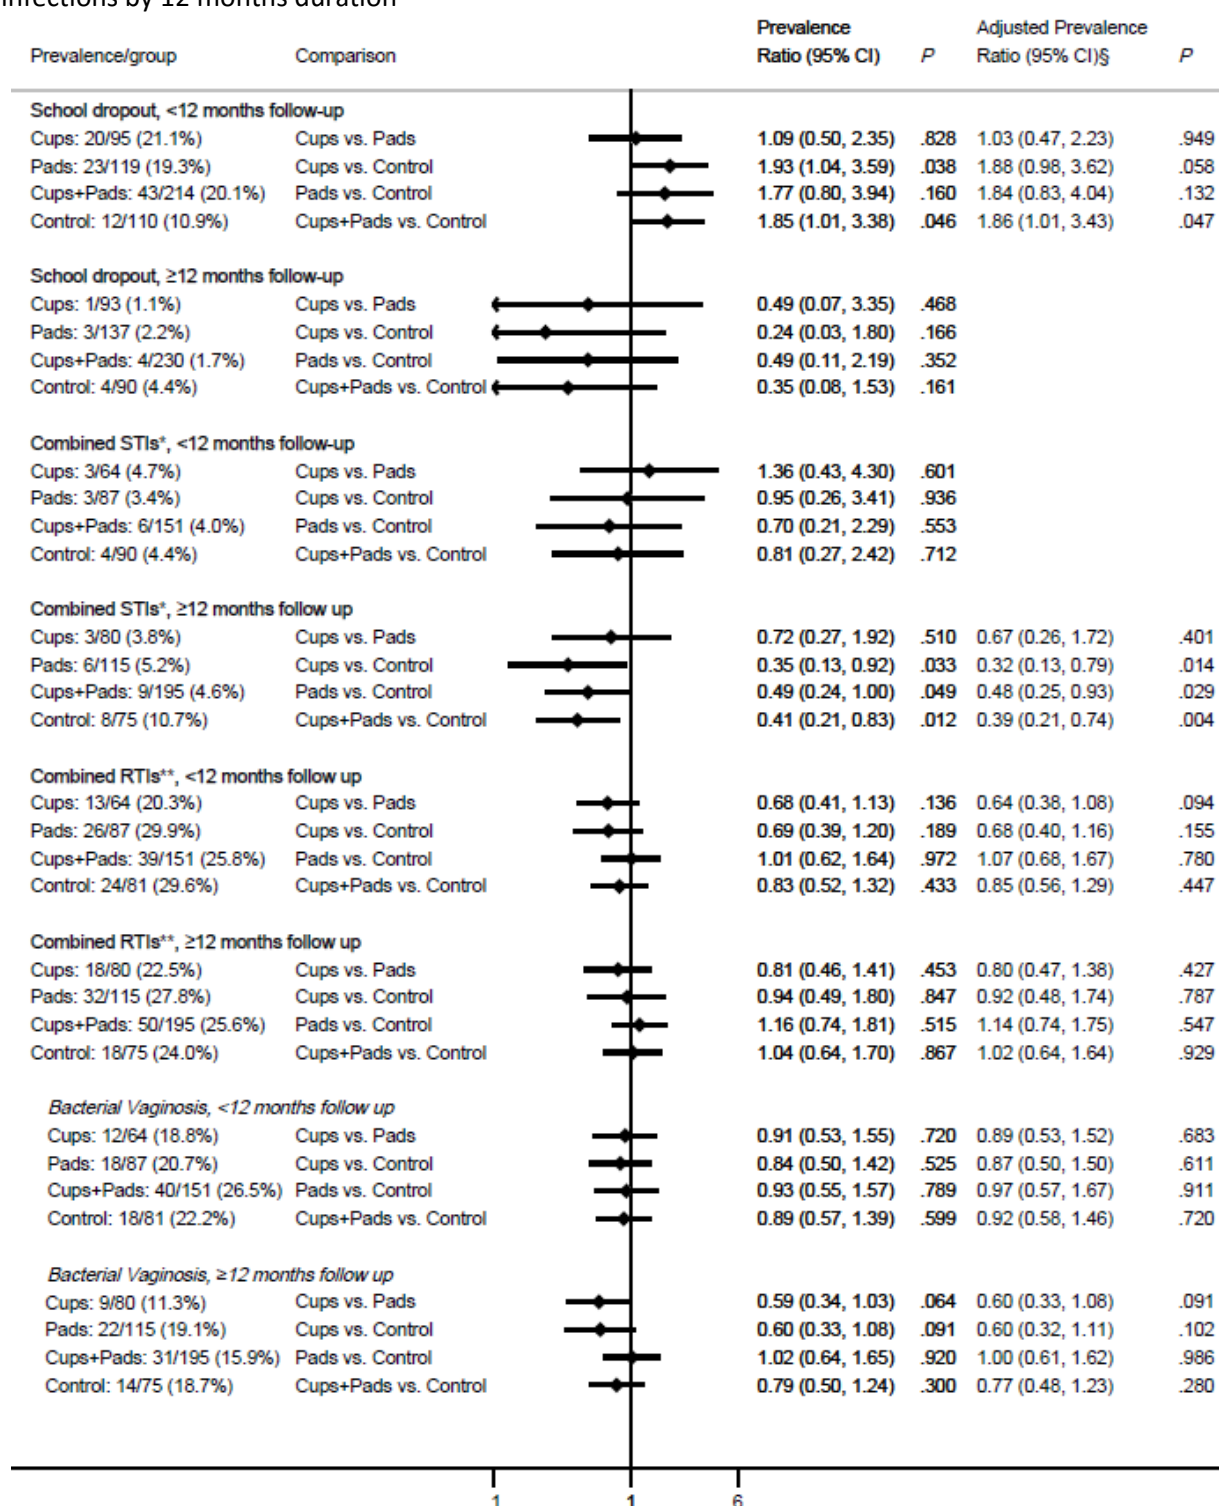

STI: sexually transmitted infections; RTI: reproductive tract infections; § Adjusted for age, socio-economic status, and reported sexual activity (had sexual intercourse) at start of study.

\* Composite of STIs at endline (presence of either *Chlamydia trachomatis*, *Trichomonas vaginalis*, or *Neisseria gonorrhoea*); \*\* Composite RTIs tested at endline (presence of either bacterial vaginosis or *Candida albicans*).
